# Supplementary material
Source: publisher figshare collection journal article supplement (https://brill.figshare.com/ndownloader/files/30958330)
Supplement: Supplementary file 1 [file 30958330]

## Sheet: Table S1
Code	Location	Country	N	E	Acc. cytB	Acc. 16s	Hap	Lineage	Reference
1	Kyllini Mt.	Greece	37.920	22.001	EF650001	EF649992	H21	veluchiensis	Sotiropoulos et al. 2008
2	Kalavryta	Greece	38.033	22.110	EF650003	EF649994	H22	veluchiensis	Sotiropoulos et al. 2008
	Kalavryta	Greece	38.033	22.110	EF650004	EF649995	H23	veluchiensis	Sotiropoulos et al. 2008
3	Panachaiko	Greece	38.208	21.882	EF650002	EF649993	H22	veluchiensis	Sotiropoulos et al. 2008
4	Kallidromo Mt.	Greece	38.729	22.599	EF650005	EF649996	H24	veluchiensis	Sotiropoulos et al. 2008
5	Oiti Mt. 1	Greece	38.818	22.282	EF650006	EF649997	H25	veluchiensis	Sotiropoulos et al. 2008
	Oiti Mt. 1	Greece	38.818	22.282	EF650007	EF649998	H26	veluchiensis	Sotiropoulos et al. 2008
6	Belokomitis	Greece	39.259	21.729	EF650008	EF649999	H27	veluchiensis	Sotiropoulos et al. 2008
7	Aoos’ springs lake	Greece	39.852	21.071	EF650009	EF650000	H28	veluchiensis	Sotiropoulos et al. 2008
	Kyllini Mt.	Greece	37.920	22.001	DQ481513	DQ481488	H29	veluchiensis	Sotiropoulos et al. 2007
8	Rakita (Panachaiko Mt.)	Greece	38.138	21.962	DQ481514	DQ481489	H22	veluchiensis	Sotiropoulos et al. 2007
9	Katavothra (Oeta Mt.)	Greece	38.822	22.283	DQ481515	DQ481490	H30	veluchiensis	Sotiropoulos et al. 2007
10	Velouchi Mt.	Greece	38.939	21.807	DQ481516	DQ481491	H30	veluchiensis	Sotiropoulos et al. 2007
11	Elati (Kerketio Mt.)	Greece	39.505	21.534	DQ481517	DQ481492	H31	veluchiensis	Sotiropoulos et al. 2007
12	Zygos Mt.	Greece	37.378	22.403	DQ481518	DQ481493	H28	veluchiensis	Sotiropoulos et al. 2007
13	Drakolimni (Tymphi Mt.)	Greece	39.992	20.786	DQ481519	DQ481494	H32	veluchiensis	Sotiropoulos et al. 2007
14	Drakolimni (Smolikas Mt.)	Greece	40.070	20.926	DQ481520	DQ481495	H33	veluchiensis	Sotiropoulos et al. 2007
15	Gistova Lake	Greece	40.361	20.793	KF941301	KF941302	H55	veluchiensis	Papaioannou et al., 2015
16	Podgorečko Lakre (Jablanica Mt.)	Macedonia	41.256	20.522	DQ481521	DQ481496	H34	alpestris e	Sotiropoulos et al. 2007
17	Donje Ravne mlake (Šara Mt.)	Serbia	42.107	20.693	DQ481522	DQ481497	H35	alpestris e	Sotiropoulos et al. 2007
18	Vlasina	Serbia	42.832	22.283	DQ481534	DQ481509	H36	vlasina	Sotiropoulos et al. 2007
19	Mlačiške (Meane)	Serbia	42.791	22.237	EF089304	EF089270	H36	vlasina	Sotiropoulos et al. 2007
	Mlačiške (Meane)	Serbia	42.791	22.237	EF089305	EF089271	H37	vlasina	Sotiropoulos et al. 2007
20	Vlasina Stojkovića)	Serbia	42.694	22.370	EF089306	EF089272	H36	vlasina	Sotiropoulos et al. 2007
21	Klisura	Serbia	42.758	22.412	EF089307	EF089273	H38	vlasina	Sotiropoulos et al. 2007
	Klisura	Serbia	42.758	22.412	EF089308	EF089274	H39	vlasina	Sotiropoulos et al. 2007
	Klisura	Serbia	42.758	22.412	EF089309	EF089275	H40	vlasina	Sotiropoulos et al. 2007
22	Bosica	Serbia	42.616	22.400	EF089310	EF089276	H36	vlasina	Sotiropoulos et al. 2007
	Bosica	Serbia	42.616	22.400	EF089311	EF089277	H40	vlasina	Sotiropoulos et al. 2007
	Bosica	Serbia	42.616	22.400	EF089312	EF089278	H39	vlasina	Sotiropoulos et al. 2007
23	Sihastria Monastery	Romania	47.158	26.195	EF089317	EF089283	H41	alpestris w	Sotiropoulos et al. 2007
24	Varatec	Romania	47.137	26.269	EF089318	EF089284	H41	alpestris w	Sotiropoulos et al. 2007
25	Gaaden	Austria	48.043	16.201	EF089320	EF089286	H41	alpestris w	Sotiropoulos et al. 2007
26	Brand	Austria	48.636	14.896	EF089325	EF089291	H41	alpestris w	Sotiropoulos et al. 2007
	Brand	Austria	48.636	14.896	EF089326	EF089292	H42	alpestris w	Sotiropoulos et al. 2007
27	Irdning	Austria	47.469	14.119	EF089322	EF089288	H41	alpestris w	Sotiropoulos et al. 2007
28	Obertrum	Austria	47.902	13.069	EF089319	EF089285	H41	alpestris w	Sotiropoulos et al. 2007
29	Mallnitz	Austria	46.954	13.172	EF089324	EF089290	H42	alpestris w	Sotiropoulos et al. 2007
30	Klein-Kordin-Alm	Austria	46.589	13.149	EF089321	EF089287	H41	alpestris w	Sotiropoulos et al. 2007
31	Obertilliach	Austria	46.707	12.617	EF089323	EF089289	H41	alpestris w	Sotiropoulos et al. 2007
32	Črno jezero, Julian Alps	Slovenia	46.439	15.432	JN232956	JN232962	H51	alpestris w	Lužnik et al., 2011
	Črno jezero, Julian Alps	Slovenia	46.439	15.432	JN232957	JN232963	H51	alpestris w	Lužnik et al., 2011
33	Breginj	Slovenia	46.252	13.430	JN232959	JN232965	H52	alpestris w	Lužnik et al., 2011
	Breginj	Slovenia	46.252	13.430	JN232960	JN232966	H52	alpestris w	Lužnik et al., 2011
34	Tolmin	Slovenia	46.178	13.729	JN232959	JN2329	H53	alpestris w	Lužnik et al., 2011
35	Smrekovec	Slovenia	46.406	14.899	JN232961	JN232967	H54	alpestris w	Lužnik et al., 2011
36	Rakitovec	Slovenia	46.183	15.457	JN232958	JN232964	H52	alpestris w	Lužnik et al., 2011
37	Adlikon, Zurich Canton	Switzerland	47.576	8.694	EU880335	EU880335	H41	alpestris w	Zhang et al., 2008
38	Eindhoven	Netherlands	51.435	5.467	EF089332	EF089298	H41	alpestris w	Sotiropoulos et al. 2007
39	Leende	Netherlands	51.343	5.543	EF089333	EF089299	H41	alpestris w	Sotiropoulos et al. 2007
	Leende	Netherlands	51.343	5.543	EF089334	EF089300	H41	alpestris w	Sotiropoulos et al. 2007
40	Monte Cesen, Valdobiadene	Italy	45.938	12.004	EF089328	EF089294	H44	alpestris w	Sotiropoulos et al. 2007
41	Venecia-Trieste	Italy	45.903	12.094	EF089327	EF089293	H43	alpestris w	Sotiropoulos et al. 2007
42	North Italy	Italy	46.154	11.295	EF089329	EF089295	H45	apuana	Sotiropoulos et al. 2007
43	Ceppo di Lencisa, Genova	Italy	44.479	8.913	EF089330	EF089296	H46	apuana	Sotiropoulos et al. 2007
44	Spezia	Italy	44.142	9.811	EF089331	EF089297	H47	apuana	Sotiropoulos et al. 2007
45	Calabria	Italy	39.309	16.346	DQ092232	DQ092279	H50	apuana	Carranza & Amat 2005
46	Zubilabala-Erreka	Spain	43.014	-3.562	EF089336	EF089302	H49	cyreni	Sotiropoulos et al. 2007
47	Navarra	Spain	42.648	-1.686	EF089335	EF089301	H48	cyreni	Sotiropoulos et al. 2007
